# Supplementary material for: Real-World Application of Trio-Based Exome Sequencing in Prenatal Genetic Diagnosis
Source: Research Square preprint supplement (doi:10.21203/rs.3.rs-8038718/v1), 2025-11-26
Supplement: Supplementary file 1 [file a3b1605e79cc40b8910c5251.docx]

**Supplementary Table 2.** Autosomal recessive variants identified in fetuses with structural anomalies detected by prenatal ultrasound.

| **Ultrasound Anomaly Observed** | **G.W** | **Gene** | **RefSeq**  **transcript** | **Variant 1** | **Variant 2** | **Zygosity** |
| --- | --- | --- | --- | --- | --- | --- |
| Anamnios, nephromegaly, absence of stomach and bladder. | 28 | ***PKHD1*** | NM_138694.3 | c.5912G>A (p.Gly1971Asp) | c.5895dupA (p.Leu1966ThrfsTer4) | **Compound** |
| Arthrogryposis multiplex, hydrops fetalis | 22 | ***NUP88*** | NM_002532.6 | c.1898_1899del (p.Gln633fsTer17) | c.857+2_857+3insT | **Compound** |
| Arthrogryposis multiplex, enlarged kidneys, posterior fossa | 16 | ***TMEM216*** | NM_001173991.2 | c.217C>T (p.Arg73Cys | c.181_183delGTG (p.Val61del) | **Compound** |
| Intrauterine growth retardation | 28 | ***RTEL1*** | NM_001283009.2 | c.3724_3725delTG (p.Cys1244fsTer17) | c.1846G>A (p.Gly616Ser) | **Compound** |
| Skeletal dysplasia. Achondroplasia | 31 | ***SERPINA1*** | NM_000295.5 | c.1096G>A (p.Glu366Lys) | c.1096G>A (p.Glu366Lys) | **Homozygosis** |
| Skeletal dysplasia. Achondroplasia | 20 | ***B3GLCT*** | NM_194318.4 | c.660+1G>A | c.880_888del (p.Gln294_Ser296) | **Compound** |
| Skeletal dysplasia. Cardiac involvement | 21 | ***EVC2*** | NM_147127.5 | c.821_824del (p.Arg274fsTer3) | c.222_228+21del (p.Ser74fsTer6) | **Compound** |
| Hydrocephalus, polydactyly, polycystic kidneys, skeletal dysplasia. | 17 | ***B9D2*** | NM_030578.3 | c.215-2A>G | c.215-2A>G | **Homozygosis** |
| Hydrops fetalis | 26 | ***MRPS22*** | NM_020191.4 | c.509G>A (p.Arg170His) | c.758delT (p.Ile253LysfsTer24) | **Compound** |
| Hydrops fetalis | 11 | ***PKD1L1*** | NM_138295.5 | c.3663+1G>A | c.6473+2_6473+3delTG | **Compound** |
| Hydrops fetalis, frontotemporal cutaneous edema | 20 | ***CTSA*** | NM_000308.4 | c.1123C>T (p.Arg375Ter) | c.1123C>T (p.Arg375Ter) | **Homozygosis** |
| Hydrops fetalis, limb malposition. | 14 | ***SPART*** | NM_001142294 | c.380dupC (p.Glu128ArgfsTer6) | c.380dupC (p.Glu128ArgfsTer6) | **Homozygosis** |
| Microcephaly, agenesis of the corpus callosum, cerebellar hypoplasia | 21 | ***PNPLA8*** | NM_015723.4 | c.2167C>T (p.Arg723Ter) | c.2167C>T (p.Arg723Ter) | **Homozygosis** |
| Polycystic kidneys, multicystic dysplasia. | 21 | ***TRAF3IP1*** | NM_015650.3 | c.1159+1G>C | c.1831G>A (p.Val611Met) | **Compound** |
| Complex congenital heart disease | 15 | ***NADSYN1*** | NM_018161.5 | c.146G>T (p.Cys49Phe) | c.395G>T (p.Trp132Leu) | **Compound** |
| Severe intrauterine growth restriction | 20 | ***RFX6*** | NM_173560.4 | c.541C>T (p.Arg181Trp) | c.541C>T (p.Arg181Trp) | **Homozygosis** |
| Oligohydramnios, renal pathology, absence of gastric chamber | 30 | ***PKHD1*** | NM_138694.4 | c.10174C>T (p.Gln3392ter) | c.5895dup (p.Leu1966fsTer4) | **Compound** |
| Cardiomegaly, severe anaemia,retrognathia | 16 | ***LARS2*** | NM_015340.4 | c.1565C>A (p.Thr522Asn) | c.1565C>A (p.Thr522Asn) | **Homozygosis** |
| Intrauterine growth restriction | 20 | ***LIG4*** | NM_206937.2 | c.2440C>T(p.Arg814Ter) | c.1751_1755delTAAGA (p.Ile584fsTer2) | **Compound** |
| Hydrops fetalis | 20 | ***DHCR24*** | NM_014762.4 | c.1055G>A (p.Arg352His) | c.1055G>A (p.Arg352His) | **Homozygosis** |

The table includes the gestational week at diagnosis (G.W), observed ultrasound anomaly, affected gene, RefSeq transcript, biallelic variants (Variant 1 and Variant 2), and zygosity (homozygous or compound heterozygous). All variants are reported using HGVS nomenclature.
