# Supplementary material for: Real-World Application of Trio-Based Exome Sequencing in Prenatal Genetic Diagnosis
Source: Research Square preprint supplement (doi:10.21203/rs.3.rs-8038718/v1), 2025-11-26
Supplement: Supplementary file 2 [file f723e372a29784a666c26068.docx]

**Supplementary Table 1.** List of *de novo* variants identified in fetuses with structural anomalies detected by prenatal ultrasound.

| **Ultrasound Anomaly Observed** | **G.W** | **Gene** | **RefSeq**  **transcript** | **Variant** | **Consequence** | **Evidence** |
| --- | --- | --- | --- | --- | --- | --- |
| Cospus callosum agenesis, diaphragmatic hernia, hyperfringent kidneys, edema | 20 | ***PPP1CB*** | NM_002709. 3 | c.754G>A (p.Asp252Asn) | **Splice site** | Novel |
| Agenesis/hypoplasia of corpus callosum | 20 | ***ASXL1*** | NM_015338.6 | c.1534C>T (p.Gln512Ter) | **stop codon** | Novel |
| Agenesis/hypoplasia of corpus callosum | 19 | ***ZEB2*** | NM_014795.4 | c.1309C>T (p.Gln437Ter) | **stop codon** | Reported |
| Agenesis/hypoplasia of corpus callosum, lipoma | 21 | ***ARID1B*** | NM_017519.3 | c.6302T>A (p.Ile2101Asn) | **missense** | Novel |
| Arthrogryposis multiplex congenita | 17 | ***ACTA1*** | NM_001100.4 | c.1126T>C (p.Cys376Arg) | **missense** | Novel |
| Delayed intrauterine growth, cerebral hyperechogenicity | 32 | ***MTOR*** | NM_004958.4 | c.5728T>C (p.Trp1910Arg) | **missense** | Novel |
| Cortical dysplasia | 28 | ***TSC2*** | NM_000548.5 | c.328C>T (p.Gln110Ter) | **stop codon** | Reported |
| Cortical dysplasia, ventriculomegaly, pontocerebellar hypoplasia, lissencephaly | 28 | ***TUBG1*** | NM_001070.5 | c.1022G>A (p.Arg341Gln) | **missense** | Reported |
| Skeletal dysplasia. Achondroplasia | 19 | ***COL2A1*** | NM_001844.5 | c.3656A>G (p.Asp1219Gly) | **deletion** | Novel |
| Skeletal dysplasia. Achondroplasia | 12 | ***COL2A1*** | NM_001844.5 | c.1068+1G>T | **Splice site** | Reported |
| Skeletal dysplasia. Achondroplasia | 16 | ***FGFR3*** | NM_000142.5 | c.1108G>T (p.Gly370Cys) | **missense** | Reported |
| Skeletal dysplasia. Achondroplasia | 12 | ***FGFR3*** | NM_000142.5 | c.1118A>G (p.Tyr373Cys) | **missense** | Reported |
| Skeletal dysplasia. Achondroplasia | 33 | ***FGFR3*** | NM_000142.5 | c.1138G>A (p.Gly380Arg) | **missense** | Reported |
| Skeletal dysplasia. Achondroplasia | 21 | ***FGFR3*** | NM_000142.5 | c.742C>T (p.Arg248Cys) | **missense** | Reported |
| Skeletal dysplasia. Achondroplasia | 27 | ***FGFR3*** | NM_000142.5 | c.1144G>A (p.Gly382Arg) | **missense** | Reported |
| Skeletal dysplasia. Achondroplasia | 28 | ***LZTR1*** | NM_006767.4 | c.1892G>A (p.Arg631Gln) | **missense** | Novel |
| Persistent nuchal edema | 28 | ***ACTB*** | NM_001101.5 | c.803G>T (p.Gly268Val) | **missense** | Novel |
| Preterm intraventricular hemorrhage | 32 | ***KAT6; ALOX15B*** | NM_006766.5 ; NM_001141.3 | c.2921G>T (p.Ser974Ile); c.857C>T (p.Ser286Phe) | **missense** | Novel; Novel |
| Periventricular nodal heterotopia | 22 | ***FLNA*** | NM_001110556.2 | c.6667_6676del (p.Gly2223SerfsTer8) | **frameshift indel** | Novel |
| Hydrops fetalis, mitroaortic hypoplasia, AUU | 13 | ***PTPN11*** | NM_002834.5 | c.172A>T (p.Asn58Tyr) | **missense** | Reported |
| Hypoplasia left chambers with aortic arch hypoplasia | 21 | ***KMT2D*** | NM_003482.4 | c.14076-2A>G | **Splice site** | Reported |
| Facial malformation, cleft palate, renal dilatation | 21 | ***CHD7*** | NM_017780.4 | c.4850G>C (p.Gly1617Ala) | **missense** | Novel |
| Club feet, claw hands, decreased mobility. | 21 | ***NALCN*** | NM_052867.4 | c.3521G>C (p.Arg1174Thr) | **missense** | Novel |
| Polymalformed. CNS, heart, kidneys and hands involvement | 20 | ***HDAC2*** | NM_001527.4 | c.1330_1333delAAAG  (p.Lys444LeufsTer61) | **frameshift indel** | Novel |
| Rasopathy | 21 | ***PTPN11*** | NM_002834.5 | c.1507G>A (p.Gly503Arg) | **missense** | Reported |
| Ventriculomegaly, altered brain morphology | 28 | ***PPP2R1A*** | NM_014225.5 | c.539T>C (p.Met180Thr) | **missense** | Reported |
| Short long bones, hypochondroplasia | 15 | ***JARID2*** | NM_004973.4 | c.45C>A (p.Tyr15Ter) | **stop codon** | Novel |
| Unilateral ventriculomegaly | 23 | ***RAC3*** | NM_005052.3 | c.191A>G (p.Tyr64Cys) | **missense** | Reported |
| Skeletal dysplasia | 21 | ***TNNI2*** | NM_003282.4 | c.496_498delGAG (p.Glu166del) | **in-frame deletion** | Reported |
| Congenital cardiopathy | 21 | ***ZMIZ1*** | NM_020338.4 | c.623delAinsGGT (p.Asn208ArgfsTer108) | **frameshift indel** | Novel |
| Skeletal dysplasia | 22 | ***SCN2A*** | NM_001040142.2 | c.2567G>A (p.Arg856Gln) | **missense** | Reported |
| Double outlet right ventricle, pulmonary valve stenosis | 19 | ***CHD7*** | NM_017780.4 | c.6148C>T (p.Arg2050Ter) | **stop codon** | Reported |
| Thanatophoric dysplasia | 12 | ***FGFR3*** | NM_000142.5 | c.742C>T (p.Arg248Cys) | **missense** | Reported |
| Rasopathy | 13 | ***PTPN11*** | NM_002834.5 | c.218C>T (p.Thr73Ile) | **missense** | Reported |
| Intrauterine growth restriction | 24 | ***DYRK1A*** | NM_001347721.2 | c.736C>T (p.Arg246Ter) | **stop codon** | Reported |
| Short long bones | 34 | ***FGFR3*** | NM_000142.5 | c.1620C>A (p.Asn540Lys) | **missense** | Reported |
| Rasopathy | 20 | ***PTPN11*** | NM_002834.5 | c.1472C>T (p.Pro491Leu) | **missense** | Reported |
| Tuberous sclerosis | 35 | ***TSC2*** | NM_000548.5 | c.337-2A>G | **Splice site** | Novel |
| Mild mitral insufficiency | 16 | ***RAF1*** | NM_002880.4 | c.788T>A (p.Val263Asp) | **missense** | Reported |

The table includes the gestational week at diagnosis (G.W), observed ultrasound anomaly, affected gene, RefSeq transcript, variant (HGVS nomenclature), predicted molecular consequence, and evidence classification (novel or reported).
